# Supplementary material
Source: MDPI journal article supplement (https://www.mdpi.com/2073-4344/9/5/458)
Supplement: s1 [file s1]

Supporting information

# **Solvothermally Doping NiS<sub>2</sub> Nanoparticles on Carbons with Ferric Ions for Efficient Oxygen Evolution Catalysis**

**Lihong Xie,<sup>1, #</sup> Dengke Zhao,<sup>1, #</sup> Jiale Dai,<sup>1, #</sup> Zexing Wu,<sup>2</sup> Ligui Li,<sup>1, 3, \*</sup>**

<sup>1</sup> *Guangzhou Key Laboratory for Surface Chemistry of Energy Materials, New Energy Research Institute, College of Environment and Energy, South China University of Technology, Guangzhou 510006, People's Republic of China. E-mail: esguili@scut.edu.cn (L. Li).*

<sup>2</sup> *State Key Laboratory Base of Eco-chemical Engineering, College of Chemistry and Molecular Engineering, Qingdao University of Science & Technology, 53 Zhengzhou Road, 266042, Qingdao, China.*

<sup>3</sup> *Key Laboratory of Fuel Cell Technology of Guangdong Province, School of Chemistry and Chemical Engineering, South China University of Technology, Guangzhou 510641, China.*

<sup>#</sup>*These authors contributed equally to this work.*

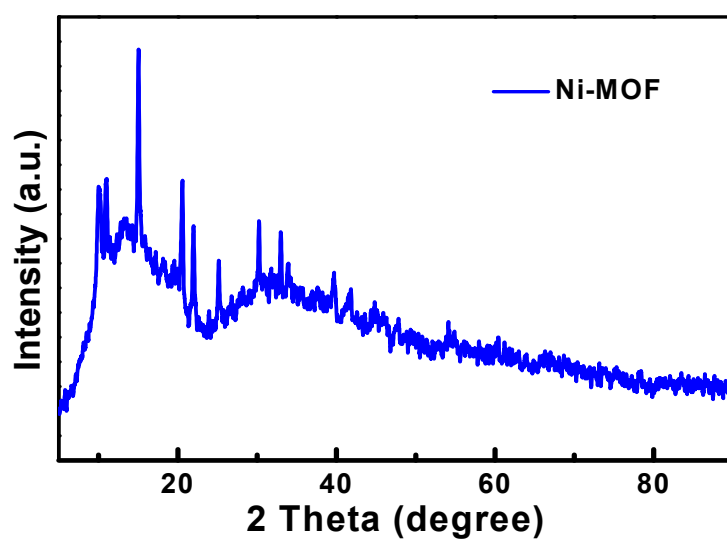

Figure S1. XRD profile of Ni-MOF.

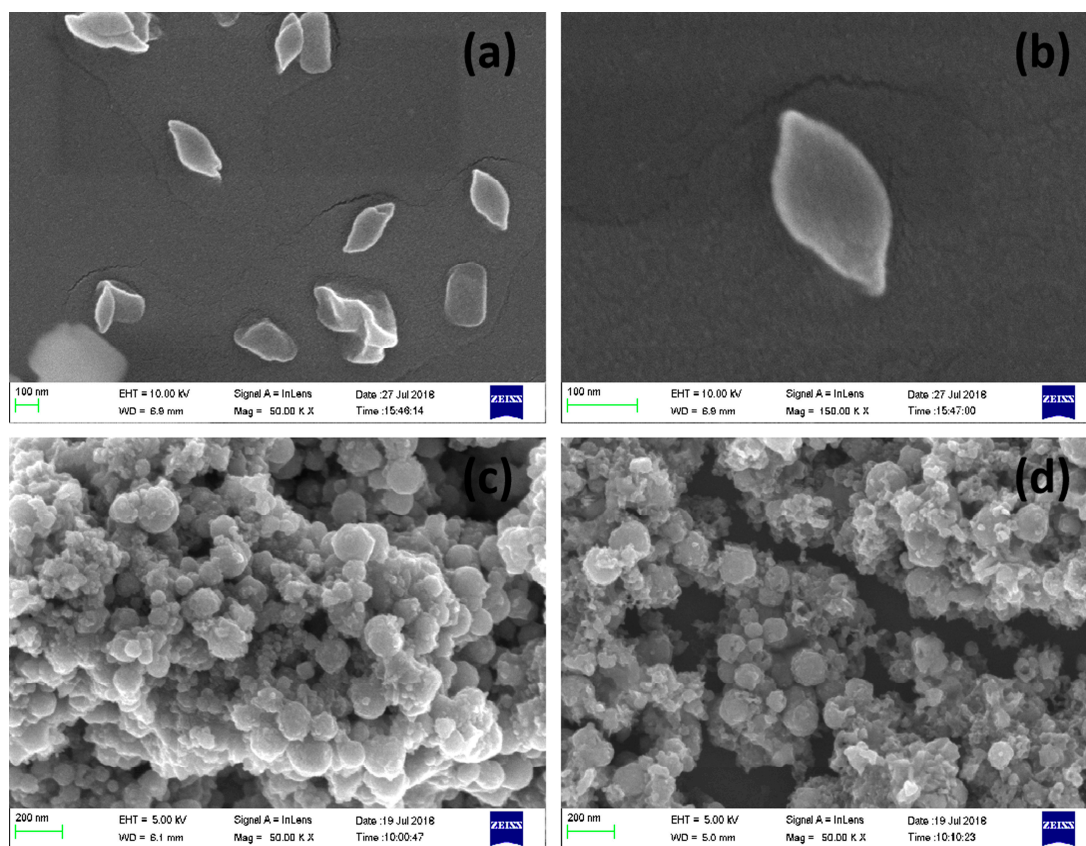

Figure S2. SEM images of (a,b) Ni-MOFs, (c) Fe-NiS<sub>2</sub>/C-10, and (d) Fe-NiS<sub>2</sub>/C-50.

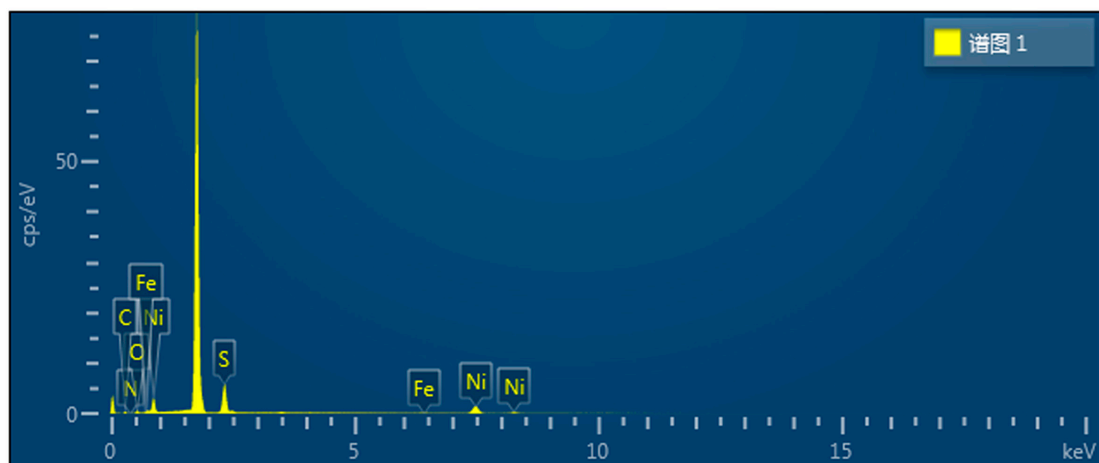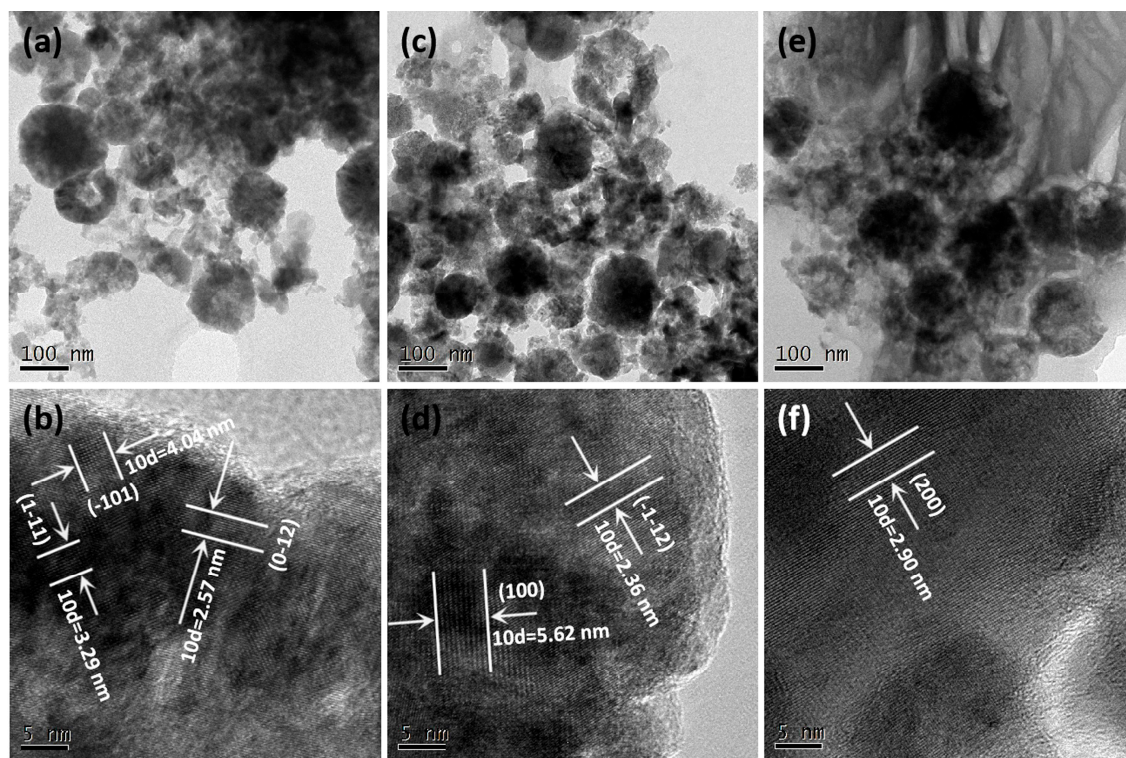

**Figure S4.** TEM images for (a, b) NiS<sub>2</sub>/C, (c, d) Fe-NiS<sub>2</sub>/C-10 and (e, f) Fe-NiS<sub>2</sub>/C-50

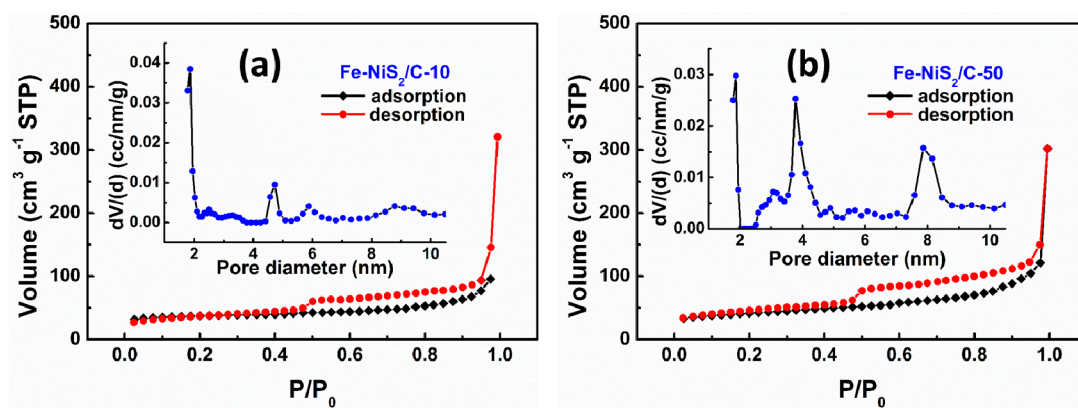

Figure S5. N<sub>2</sub> adsorption-desorption isotherms for (a) Fe-NiS<sub>2</sub>/C-10, and (b) Fe-NiS<sub>2</sub>/C-50. Inset in each panel is the corresponding pore diameter distribution plot.

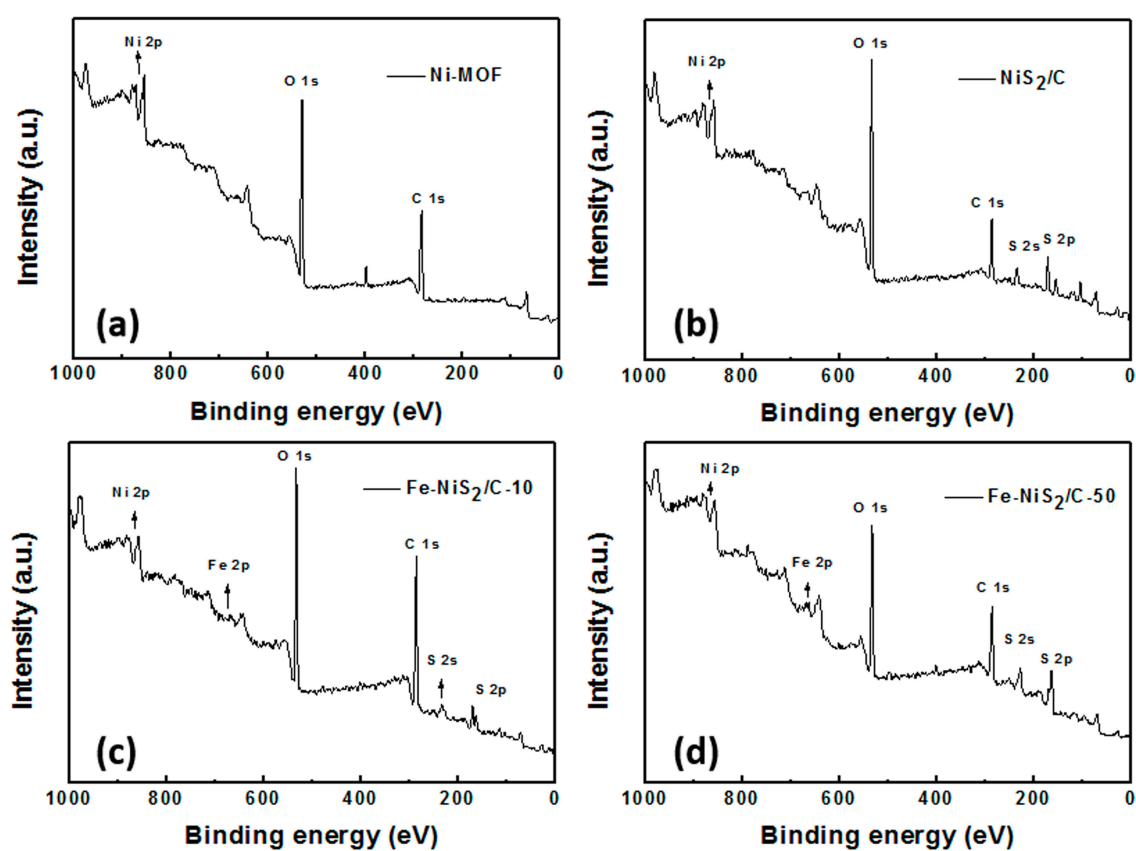

Figure S6. XPS spectra of (a) Ni-MOF, (b) NiS<sub>2</sub>/C, (c) Fe-NiS<sub>2</sub>/C-10 and (d) Fe-NiS<sub>2</sub>/C-50.



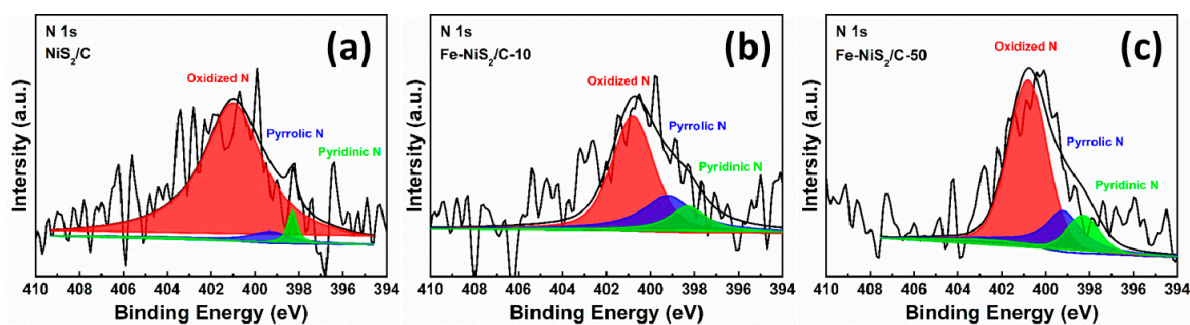

Figure S7. XPS high-resolution spectra of N 1s for (a) NiS<sub>2</sub>/C, (b) Fe-NiS<sub>2</sub>/C-10 and (c) Fe-NiS<sub>2</sub>/C-50

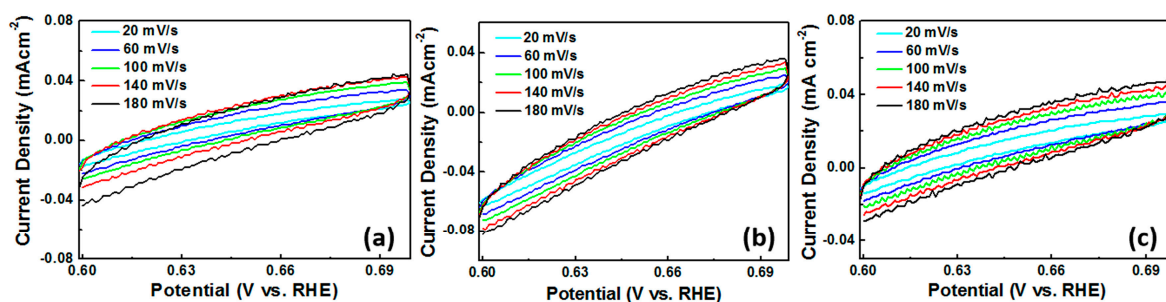

Figure S8. Cyclic voltammograms at different potential scan rates for (a) NiS<sub>2</sub>/C, (b) Fe-NiS<sub>2</sub>/C-10 and (c) Fe-NiS<sub>2</sub>/C-50 samples.

Table S1. Percentages of different types of N in the series samples in this work.

| Catalyst                  | Pyridinic N (at.%) | Pyrrolic N (at.%) | Oxidized N (at.%) |
|---------------------------|--------------------|-------------------|-------------------|
| Fe-NiS <sub>2</sub> /C-10 | 14.3               | 27.5              | 58.2              |
| Fe-NiS <sub>2</sub> /C-30 | 7.1                | 9.8               | 83.1              |
| Fe-NiS <sub>2</sub> /C-50 | 13.9               | 20.4              | 65.7              |
| NiS <sub>2</sub> /C       | 3.3                | 5.0               | 91.7              |
